# Supplementary material for: Tyrosine Y189 in the Substrate Domain of the Adhesion Docking Protein NEDD9 Is Conserved with p130Cas Y253 and Regulates NEDD9-Mediated Migration and Focal Adhesion Dynamics
Source: PubMed Central journal article supplement (PMC3706375; doi:10.1371/journal.pone.0069304), 2013-07-09
Supplement: pone.0069304.s001.pdf [file pone.0069304.s001.pdf]

## Results colour-coded for amino acid conservation

The current colourscheme of the alignment is for **amino acid conservation**.

The conservation scoring is performed by PRALINE. The scoring scheme works from 0 for the least conserved alignment position, up to 10 for the most conserved alignment position. The colour assignments are:

Unconserved 0 1 2 3 4 5 6 7 8 9 10 Conserved

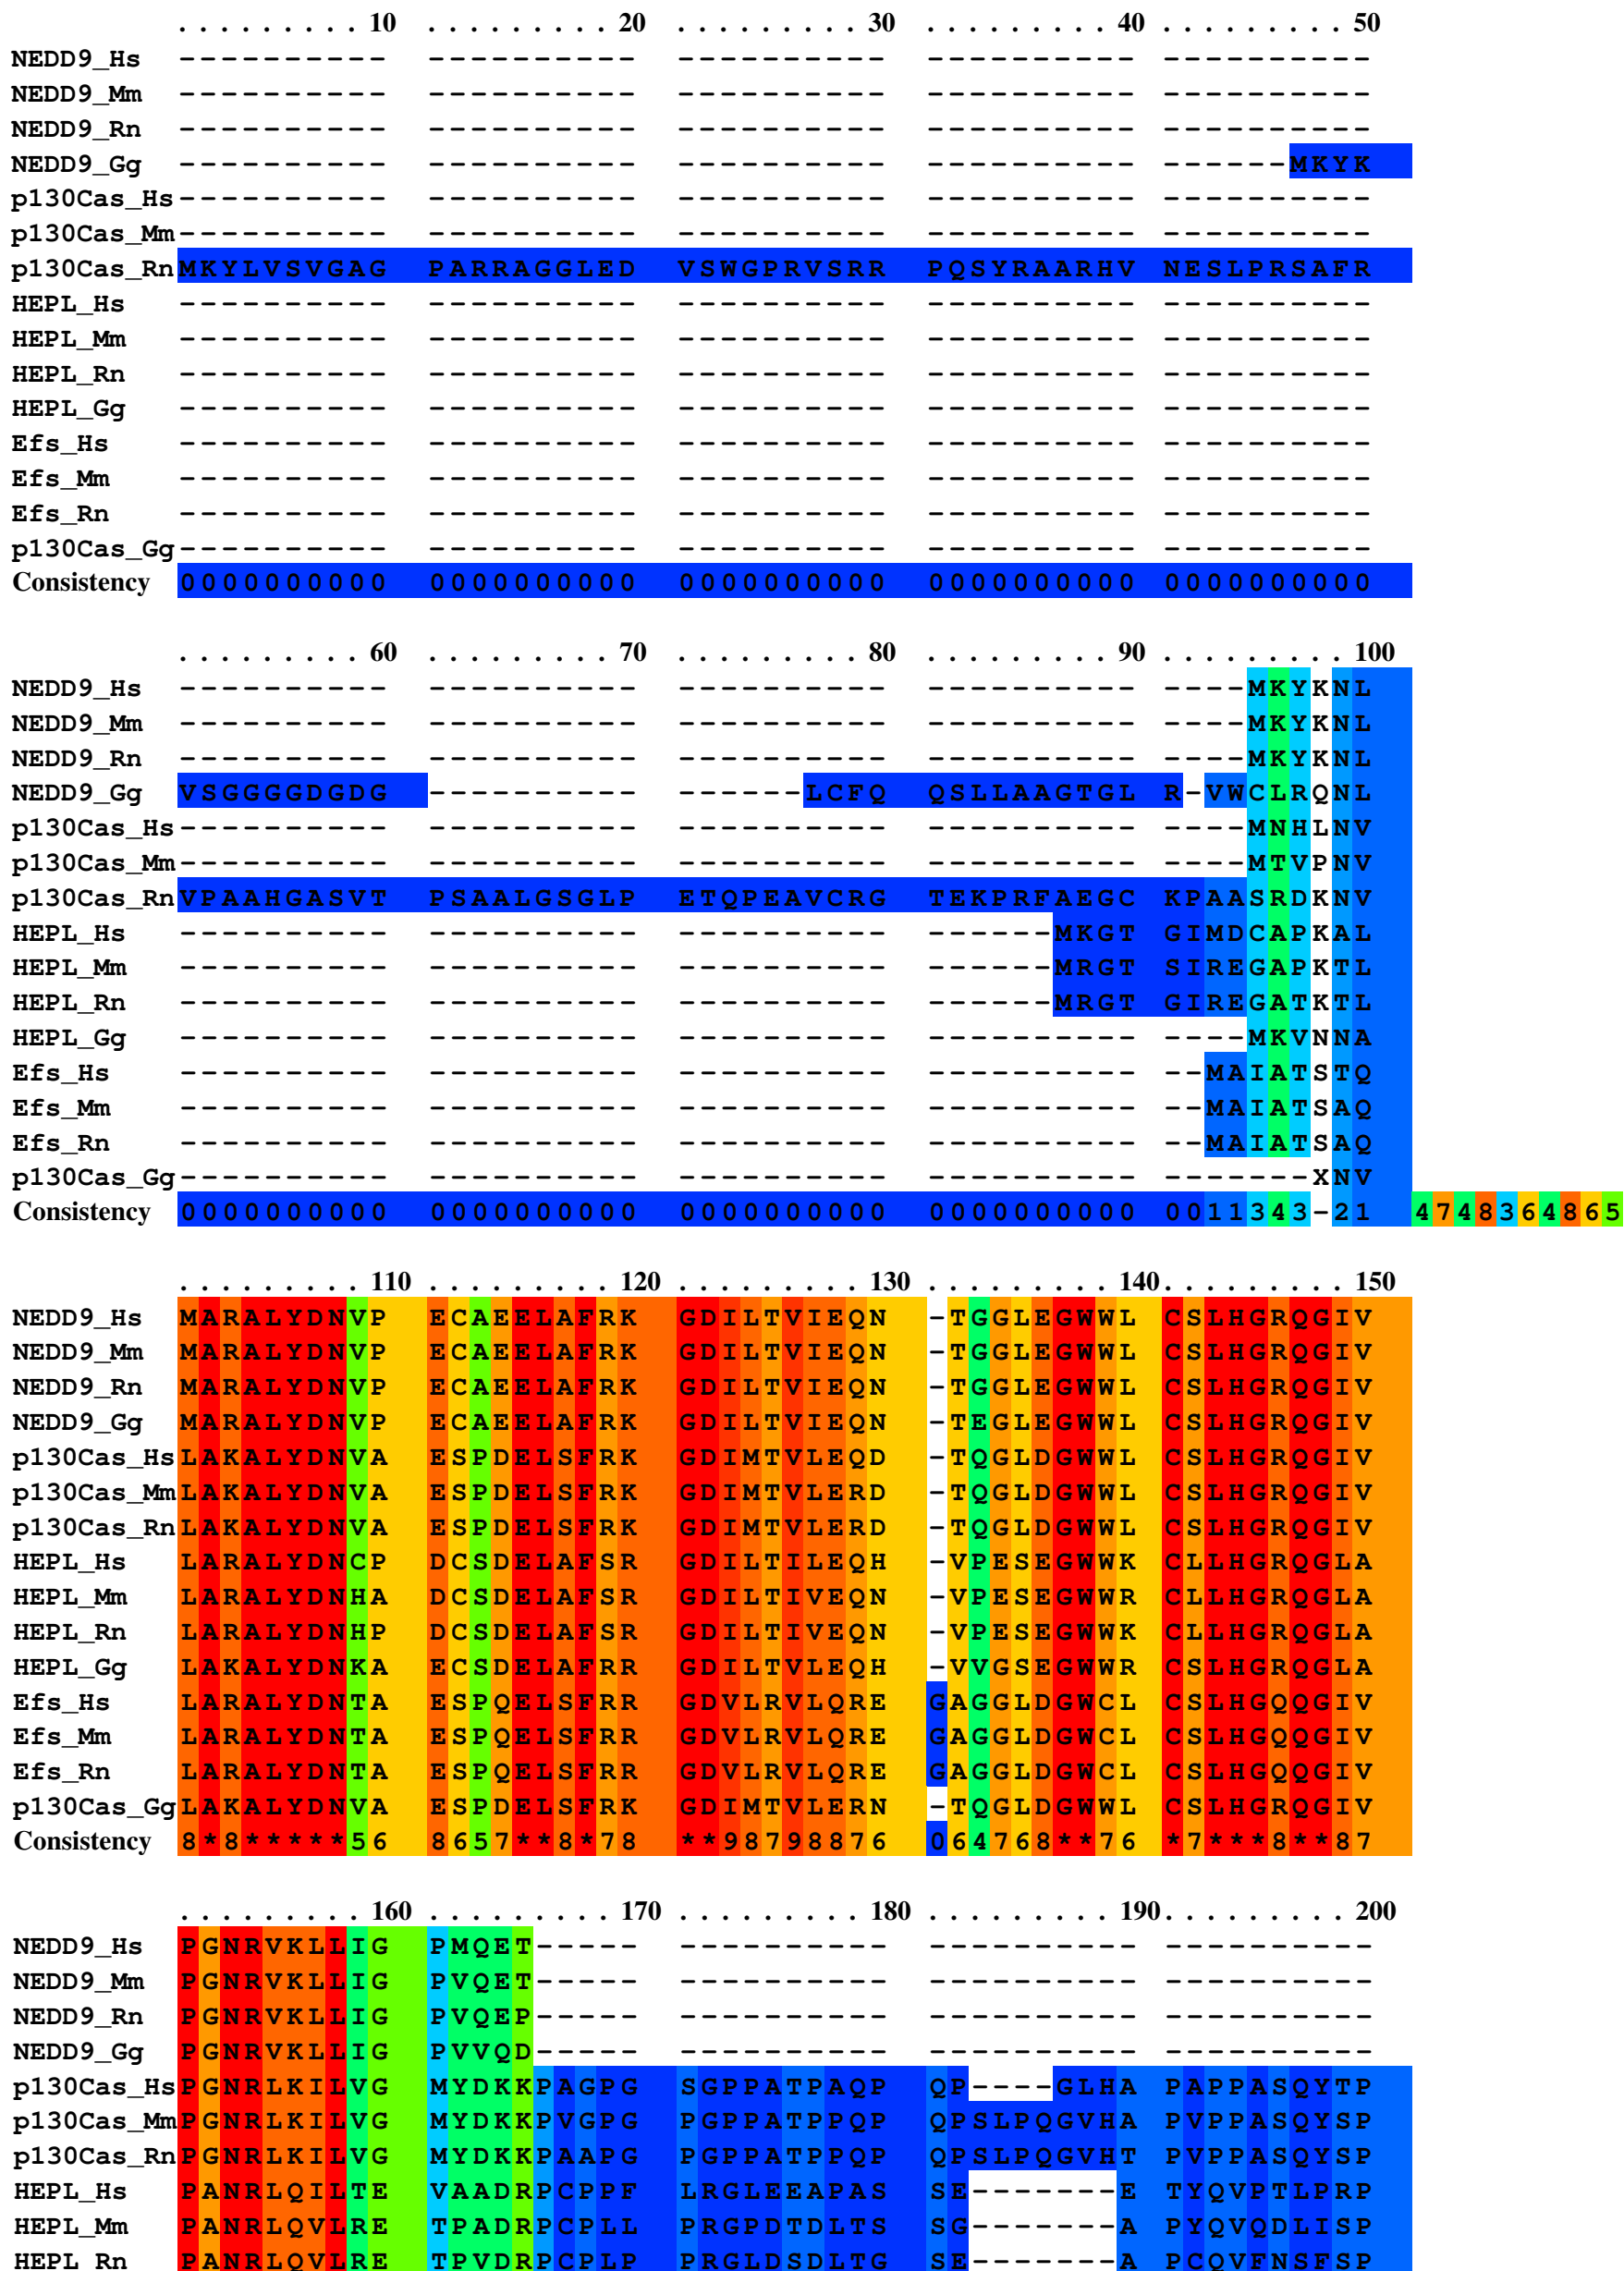

|             |            |          |       |            |            |            |       |            |
|-------------|------------|----------|-------|------------|------------|------------|-------|------------|
| HEPL_Gg     | PANRLQLLAG | -PQALPPP | AI    | PSDAPEPPVA | PQ         | -----      | N     | IYQVPSVPKG |
| Efs_Hs      | PANRVKLLPA | GPAPK    | ----- | -----      | -----      | -----      | ----- | -----      |
| Efs_Mm      | PANRVKLLPA | GPAPK    | ----- | -----      | -----      | -----      | ----- | -----      |
| Efs_Rn      | PANRVKLLPA | SPAPK    | ----- | -----      | -----      | -----      | ----- | -----      |
| p130Cas_Gg  | PGNRLKILVG | MYDKK    | ----- | -----      | -----      | -----      | ----- | -----      |
| Consistency | *7**888*45 | 34445    | 20100 | 1000011000 | 1000000001 | 1011010011 |       |            |

|             |                 |                 |                 |                 |            |
|-------------|-----------------|-----------------|-----------------|-----------------|------------|
|             | ..... 210 ..... | ..... 220 ..... | ..... 230 ..... | ..... 240 ..... | ..... 250  |
| NEDD9_Hs    | -----ASSHE      | QPASGLMQQT      | FGQQKLYQVP      | NPQAAPRDTI      | YQVPP----- |
| NEDD9_Mm    | -----PGHE       | QPTPGPMHQT      | FGQQKLYQVP      | NSQAASRDTI      | YQVPP----- |
| NEDD9_Rn    | -----SSHE       | QPTPGPMHQN      | FGQQKLYQVP      | NSQAAPRDTI      | YQVPP----- |
| NEDD9_Gg    | -----GPSSQD     | MSNSGLTHQS      | FNQQKIYQVP      | SSHASARDPV      | YQVPP----- |
| p130Cas_Hs  | MLPNTYQPQP      | DSVYLVPTPS      | KAQQGLYQVP      | GPSPOFQSP       | AKQTSTFSKQ |
| p130Cas_Mm  | MLPTAYQPQS      | DNVYLVPTPS      | KTQQGLYQAP      | GPNPQFQSP       | AKQTSTFSKQ |
| p130Cas_Rn  | MLPTAYQPQP      | DNVYLVPTPS      | KTQQGLYQAP      | GPNPQFQSP       | AKQTSTFSKQ |
| HEPL_Hs     | PTPGPVYEQM      | RSWAEGPQP       | T--AQVYEF       | DPPTSARIIC      | EKTL-----  |
| HEPL_Mm     | PPQGPVYEP       | RSWVEGSPA       | T--AQVYEL       | ESPSSARIIC      | EKTL-----  |
| HEPL_Rn     | PTPGPVYEP       | KSWVEGSPA       | T--AQVYEL       | DSPSSARIIC      | EKTL-----  |
| HEPL_Gg     | TASSSTYEKM      | EGWVTSPARA      | ATLPAQGVYQ      | VPALAAQLLS      | ERTR-----  |
| Efs_Hs      | -----           | PSLSPASPA       | QPG-SPYPAP      | DHSN-----       | -----      |
| Efs_Mm      | -----           | PSLCPASPT       | QPG-SSCPTP      | ERGC-----       | -----      |
| Efs_Rn      | -----           | PSLCPAPPT       | QPGCSSCPTP      | ERGC-----       | -----      |
| p130Cas_Gg  | -----QQQ        | QQQQQQQAAG      | PGQGQAPPVP      | QPTLP-----      | -----      |
| Consistency | 0010112232      | 3533334455      | 3233555559      | 4534324221      | 2322100000 |

|             |                 |                 |                 |                 |            |
|-------------|-----------------|-----------------|-----------------|-----------------|------------|
|             | ..... 260 ..... | ..... 270 ..... | ..... 280 ..... | ..... 290 ..... | ..... 300  |
| NEDD9_Hs    | -----SYQN       | QGIYQVPTGH      | GTQEQEYVQV      | PPSVQR-----     | -----SIG   |
| NEDD9_Mm    | -----SYQN       | QGIYQVPTGH      | GTPEQDVYQV      | PPSVQR-----     | -----NIG   |
| NEDD9_Rn    | -----SYQN       | QGIYQVPTGH      | GTPEQDVYQV      | PPSVQR-----     | -----NIG   |
| NEDD9_Gg    | -----SHTN       | QGIYQIPTGH      | GVAGQDIYQV      | PPSTQR-----     | -----CLD   |
| p130Cas_Hs  | TPHHPFPSPA      | TDLYQVPPGP      | GGPAQDIYQV      | PPSAGMGHDI      | YQVPPSMDTR |
| p130Cas_Mm  | TPHHSFPSPA      | TDLYQVPPGP      | GSPAQDIYQV      | PPSAGIGHDI      | YQVPPSLDTR |
| p130Cas_Rn  | TPHHSFPSPA      | TDLYQVPPGP      | GSPAQDIYQV      | PPSAGTGHDI      | YQVPPSLDTR |
| HEPL_Hs     | -----SFPK       | QAILTLRPRV      | RASLPTLPSQ      | VYDVPT-----     | -----      |
| HEPL_Mm     | -----SFPK       | QALSVLPRPT      | RASLPTLPSQ      | VYDVPV-----     | -----      |
| HEPL_Rn     | -----NFPK       | QALFVLPRPT      | RASLPTLPSQ      | VYDVPV-----     | -----      |
| HEPL_Gg     | -----CSTQ       | QHLFTLPRAC      | RASVPNITSE      | LYDVPSMQSR      | ESLLTQSGAT |
| Efs_Hs      | -----ED         | QEVYVPPPA       | RPCPTSGPPA      | GPCPPS-----     | -----      |
| Efs_Mm      | -----EE         | QEVYVPPPA       | RPCSASGLPA      | RSCSPS-----     | -----      |
| Efs_Rn      | -----EE         | QEVYVPPPA       | RPCSASGLPA      | RSCSPS-----     | -----      |
| p130Cas_Gg  | -----YH         | HQGGYAPLSP      | ASQYTPMHPS      | YVPQGD-----     | -----      |
| Consistency | 0000002244      | 747657*453      | 5443555455      | 3455440000      | 0000000111 |

|             |                 |                 |                 |                 |            |
|-------------|-----------------|-----------------|-----------------|-----------------|------------|
|             | ..... 310 ..... | ..... 320 ..... | ..... 330 ..... | ..... 340 ..... | ..... 350  |
| NEDD9_Hs    | GTSGPHVGKK      | VITP-VRTGH      | GYVYEYPSRY      | QKDVDYDIPP      | --SHTTQGVY |
| NEDD9_Mm    | GTNGPLLSKK      | VITP-VRTGH      | GYVYEYPSRY      | QKDVDYDIPP      | --SHSTQGVY |
| NEDD9_Rn    | STNGPHLGKK      | VITP-VRVGH      | GYVYEHPSRY      | QKDVDYDIPP      | --SHTTQGVY |
| NEDD9_Gg    | GPPLT---NK      | VITP-VRSGQ      | GYVYEFPSKY      | QKDTYDIPP       | --VRPLQGIY |
| p130Cas_Hs  | SWEGTKPPAK      | VVVP-TRVGQ      | GYVYEAAQPE      | Q-DEYDIPRH      | LLAPGPQDIY |
| p130Cas_Mm  | GWEGTKPPAK      | VVVP-TRVGQ      | GYVYEAAQTE      | Q-DEYDTPRH      | LLAPGPQDIY |
| p130Cas_Rn  | SWEGTKPPAK      | VVVP-TRVGQ      | GYVYEASQAE      | Q-DEYDTPRH      | LLAPGSQDIY |
| HEPL_Hs     | ---QHRGPVV      | LKEP---EK       | QQLYDIPASP      | KKAG-----       | --LHPPDSQA |
| HEPL_Mm     | ---QRQGFST      | LERL---EK       | QQFYDIPTSS      | QKAL-----       | --LHSSTSQA |
| HEPL_Rn     | ---QRQVSST      | LERP---EK       | QQFYDIPTSS      | QKAV-----       | --F--HISTS |
| HEPL_Gg     | PPAARKGSVL      | LRSPRCFQEE      | QQFYNVPSSS      | EKAGAVIQDS      | AVGNLYDVPS |
| Efs_Hs      | -----           | -----P          | DLIYKIPRAS      | -----           | -----GTQL  |
| Efs_Mm      | -----           | -----S          | DSIYKVPRVN      | -----           | -----GMQL  |
| Efs_Rn      | -----           | -----S          | DSIYKVPRVN      | -----           | -----GIQL  |
| p130Cas_Gg  | -----           | -----           | NVYLMVPG        | K-----          | -----      |
| Consistency | 1012221123      | 4224012134      | 447*547544      | 5232221210      | 0022124344 |

|            |                 |                 |                 |                 |            |
|------------|-----------------|-----------------|-----------------|-----------------|------------|
|            | ..... 360 ..... | ..... 370 ..... | ..... 380 ..... | ..... 390 ..... | ..... 400  |
| NEDD9_Hs   | DIPPSSAKGP      | VFSVPVGEIK      | PQGVYDIP--      | --PTKGVYAI      | PPSACRDEA- |
| NEDD9_Mm   | DIPPSSVKGP      | VFSVPVGEIK      | PQGVYDIP--      | --PTQGVYAI      | PPSACRDEA- |
| NEDD9_Rn   | DIPPSSVKGP      | VFSVPVGEIK      | PQGVYDIP--      | --PTQGVYAI      | PPSACRDEA- |
| NEDD9_Gg   | DIPPTSAGKT      | AHSVPTGDAK      | ALGVYDVP--      | --PAKGMYAT      | PPSTCRDDV- |
| p130Cas_Hs | DVPPVRGLLP      | SQYGQEVYDT      | PPMAVKGPNG      | RDPLLEVYDV      | PPSVEKGLPP |
| p130Cas_Mm | DVPPVRGLLP      | NQYGQEVYDT      | PPMAVKGPNG      | RDPLLDVYDV      | PPSVEKGLLS |
| p130Cas_Rn | DVPPVRGLLP      | NQYGQEVYDT      | PPMAVKGPNG      | RDPLLDVYDV      | PPSVEKGLPP |
| HEPL_Hs    | SGQGVPLISV      | TTLRRGGYST      | -LPNPQ----      | --KSEWIYDT      | PVSPGKASV- |
| HEPL_Mm    | SGRDVTLAPT      | MAFRQGGGYN      | PLSSPQ----      | --KSERIHDT      | PVLLKADV-  |
| HEPL_Rn    | QPGVTLAPT       | TAFRQGGGYN      | PLSSPQ----      | --KSDWIHDT      | PVSLGADV-  |
| HEPL_Gg    | KRETDASKKK      | SQKKYWGHCN      | TLPNPR----      | --KSEWIYDI      | PISPEKTGL- |
| Efs_Hs     | AAPR-----       | -----           | -----           | --DALEVYDV      | PPTALRV--  |
| Efs_Mm     | TASR-----       | -----           | -----           | --DVAEVYDV      | PPNILRA--  |

|             |            |            |            |            |            |            |            |            |             |
|-------------|------------|------------|------------|------------|------------|------------|------------|------------|-------------|
| Efs_Rn      | TAPR       | -----      | -----      | -----      | -----      | DVGEVYDV   | PPNILRA    | ----       |             |
| p130Cas_Gg  | -----      | -----      | -----      | -----      | -----      | GQQGHYSG   | SAPS       | ----       |             |
| Consistency | 4453222212 | 2221213212 | 3222220200 | 0045437866 | 9664273220 |            |            |            |             |
|             | .....      | 410        | .....      | 420        | .....      | 430        | .....      | 440        |             |
| NEDD9_Hs    | GLR        | EKYDFP     | PPMRQAGRPD | L          | RPEGV      | ---        | YDIPPTCT   | KPAGKDLHVK |             |
| NEDD9_Mm    | GLREKEYDFP | PPMKQDGKPD | T          | RPEGV      | ---        | YDIPPTST   | KTAGKDLHIK |            |             |
| NEDD9_Rn    | GLREKEYDFP | PPMKQDGKLD | T          | RPEGV      | ---        | YDIPPTST   | KTVGKDLHTK |            |             |
| NEDD9_Gg    | GLRDNLQDFS | SPAGHN     | ---        | A          | RQEGV      | ---        | YDIPPPIT   | KATGKELIKK |             |
| p130Cas_Hs  | SNHHAVIDVP | PSVSKDVPDG | PL         | REET       | ---        | YDVPPAFA   | KAKPFDPART |            |             |
| p130Cas_Mm  | SSHHSVIDVP | PSVSKDVPDG | PL         | REET       | ---        | YDVPPAFA   | KPKPFDPTRH |            |             |
| p130Cas_Rn  | SNHHSVIDVP | PSVSKDVPDG | PL         | REET       | ---        | YDVPPAFA   | KPKPFDPTRH |            |             |
| HEPL_Hs     | RNTPLTSFAE | ESRPHALPSS | S          | STFYNP     | PSG        | RS         | RSRLTPQLN  | NNVPMQKKLS |             |
| HEPL_Mm     | RNVSMTSFTK | DSGSRAIPGS | S          | AVHTGA     | ---        | VALSPQLG   | NTVQRKNSLP |            |             |
| HEPL_Rn     | RNASMTSFTK | ESCSNTIPGS | S          | VVRIGA     | ---        | VTLSPQLG   | NAVQKSSPP  |            |             |
| HEPL_Gg     | KQNSSVHSME | NQVLYDIPP  | ---        | ARYKALT    | TNA        | EAN        | VVNPQLY    | DIPPTQRKLT |             |
| Efs_Hs      | -----      | -----      | ---        | PSSGP      | ---        | YDCPASFS   | HPLTRVAPQP |            |             |
| Efs_Mm      | -----      | -----      | ---        | PSSCP      | ---        | YDSPASFS   | CPVAPVVPQP |            |             |
| Efs_Rn      | -----      | -----      | ---        | PSNCP      | ---        | YDSPASFS   | CPATPVVPQP |            |             |
| p130Cas_Gg  | -----      | -----      | ---        | ---        | ---        | GQFPAPA    | KQPPAY     | ----       |             |
| Consistency | 2221222222 | 2322222211 | 2033434000 | 0056567545 | 4444343333 |            |            |            |             |
|             | .....      | 460        | .....      | 470        | .....      | 480        | .....      | 490        |             |
| NEDD9_Hs    | YNCDIPGAAE | ---        | PVA        | RRHQ       | SLSPNHPPPQ | LGQSV      | ---        | GS         | QNDAYDVPRG  |
| NEDD9_Mm    | FPCDAPGGVE | ---        | PMA        | RRHQ       | SFSLHHAPSQ | LGQSG      | ---        | DT         | QSDAYDVPRG  |
| NEDD9_Rn    | FPCDAPGGAE | ---        | PMA        | RRHQ       | SLSLHHAPSQ | VGPSG      | ---        | DT         | QSDAYDVPRG  |
| NEDD9_Gg    | FSSEGLALTD | G          | APHK       | QSVY       | DIPVNHQNH  | LGQQI      | ---        | AP         | QKDVDYDTPRG |
| p130Cas_Hs  | PLVLAAPPPD | S          | PPA        | EDVY       | DVPPPAPDLY | DVPPGLRRPG | PG         | TLYDVPRE   |             |
| p130Cas_Mm  | PLILAAPPPD | S          | PAA        | EDVY       | DVPPPAPDLY | DVPPGLRRPG | PG         | TLYDVPRE   |             |
| p130Cas_Rn  | PLILAAPPPD | S          | PPA        | EDVY       | DVPPPAPDLY | DVPPGLRRPG | PG         | TLYDVPRE   |             |
| HEPL_Hs     | LPEIPSYGFL | V          | PRGT       | FPLDE      | DVSYKVPSSF | LIPRVEQONT | KP         | NIYDIPKA   |             |
| HEPL_Mm     | EEPTYAFPTS | R          | D          | L          | PSDA       | GGSYKVPSRF | LIPRVEQONT | MP         | NIYDTPKA    |
| HEPL_Rn     | EETSAYFLTP | R          | GDSL       | PSDA       | GSSYKVPSRF | LIPRVERQNT | KP         | NIYDTPKA   |             |
| HEPL_Gg     | FPDVPLYDVP | S          | SKDV       | LLQQ       | NGSCDVPPSL | PAPNAENQIS | GG         | NVYDIPKG   |             |
| Efs_Hs      | PGEDD      | ---        | ---        | ---        | ---        | ---        | ---        | AP         | YDVPLT      |
| Efs_Mm      | PREDE      | ---        | ---        | ---        | ---        | ---        | ---        | AP         | YDVPLA      |
| Efs_Rn      | PGEDE      | ---        | ---        | ---        | ---        | ---        | ---        | AP         | YDVPLA      |
| p130Cas_Gg  | -----      | ---        | ---        | ---        | ---        | ---        | ---        | PK         | QTPP        |
| Consistency | 3223321122 | 1031302212 | 2231223222 | 2232201112 | 2244897*54 |            |            |            |             |
|             | .....      | 510        | .....      | 520        | .....      | 530        | .....      | 540        |             |
| NEDD9_Hs    | VQF        | ---        | L          | EPPAETSEKA | NPQERDGVYD | VPLHNPDAK  | GS         | RDLVDGIN   |             |
| NEDD9_Mm    | VQF        | ---        | L          | EVPTETSEKA | NPEERDGVYD | VPLHNPDAK  | GS         | RDVVDGIN   |             |
| NEDD9_Rn    | VQF        | ---        | L          | EVPTESSEKA | NLEERDGVYD | VPLHNPDAK  | GS         | RDVVDGIN   |             |
| NEDD9_Gg    | IAF        | ---        | P          | GQQTGLNESL | ASEGREGVYD | VPPPVLQDTK | GL         | QDVTDGMN   |             |
| p130Cas_Hs  | ---        | ---        | R          | VLPPEVADGG | VVD        | SGVYA      | VPPP       | ---        | AEREAPAEK   |
| p130Cas_Mm  | ---        | ---        | R          | VLPPEVADGS | VVD        | DGVYA      | VPPP       | ---        | AEREAPTDGK  |
| p130Cas_Rn  | ---        | ---        | R          | VLPPEVADGS | VID        | DGVYA      | VPPP       | ---        | AEREAPTDGK  |
| HEPL_Hs     | TSS        | ---        | V          | S          | QAGKELEKAK | EVSEN      | SAGH       | NSSWFSR    | ---         |
| HEPL_Mm     | MQGVSHNAPK | A          | M          | QGVSLAGK   | ELERGREAPE | NSPWISG    | ---        | QTSFLSPDSD |             |
| HEPL_Rn     | MQGVFQNTSK | A          | T          | QGVSLAGK   | ELERGREAPE | NSPWVSR    | ---        | QTNFLSPDSD |             |
| HEPL_Gg     | LPT        | ---        | A          | M          | QPKKEMEKN  | SNHSGNQAYH | I          | PTQLSR     | ---         |
| Efs_Hs      | PKP        | ---        | P          | A          | ELEPDLEWEG | GREPGPIYA  | APS        | ---        | ---         |
| Efs_Mm      | LKP        | ---        | P          | A          | ELERDPEWEG | GREPGPLYA  | APS        | ---        | ---         |
| Efs_Rn      | LKS        | ---        | P          | A          | EMEPDLEWEG | GREPGPLYA  | APS        | ---        | ---         |
| p130Cas_Gg  | ---        | ---        | H          | A          | FPSAQOE    | ---        | I          | YQ         | VP          |
| Consistency | 331000004  | 4454544443 | 3352234664 | 5731111000 | 2232222212 |            |            |            |             |
|             | .....      | 560        | .....      | 570        | .....      | 580        | .....      | 590        |             |
| NEDD9_Hs    | RLSFS      | ---        | S          | TGS        | TRSNMSTSST | SSKESLSAS  | PAQD       | KRLFL      | DPDTAIERLQ  |
| NEDD9_Mm    | RLSFS      | ---        | S          | TGS        | TRSNMSTSST | SSKESLSAS  | PSQD       | KRLRL      | DPDTAIEKLY  |
| NEDD9_Rn    | RLSFS      | ---        | S          | TGS        | TRSNMSTSST | SSKESLSAS  | PSQD       | KRLLL      | DPDTAIGKLY  |
| NEDD9_Gg    | RLSFS      | ---        | S          | TGS        | TRSNMSTSST | TSKDSFSAS  | TTQD       | KRLIL      | DPDTAIERLY  |
| p130Cas_Hs  | RLSAS      | ---        | S          | TGS        | TRSSQSASSL | EVAGP      | ---        | GREPL      | ELEVAVEALA  |
| p130Cas_Mm  | RLSAS      | ---        | S          | TGS        | TRSSQSASSL | EVVVP      | ---        | GREPL      | ELEVAVESLA  |
| p130Cas_Rn  | RLSAS      | ---        | S          | TGS        | TRSSQSASSL | EVVVP      | ---        | GREPL      | ELEVAVETLA  |
| HEPL_Hs     | RLSGS      | ---        | S          | SDS        | RASIVSSCST | TSTDSSSSS  | SEESAKELS  | DL         | VDVAKETVM   |
| HEPL_Mm     | RLSVA      | ---        | S          | SDS        | RASVVSSCSS | ISMDSSSGSS | SEDSVKELWM | DV         | DFAKETAV    |
| HEPL_Rn     | RLSVA      | ---        | S          | SDS        | RASVVSSCSS | LSTDSSPGSS | SEDSVKELWM | DL         | DFAKETAV    |
| HEPL_Gg     | MCGHDNSADS | K          | N          | S          | TLSMSSN    | SSSESSSASS | S          | DEPDKEIKL  | DLEVAIETLT  |
| Efs_Hs      | ---        | ---        | ---        | ---        | ---        | ---        | ---        | NL         | KRASALLNLY  |
| Efs_Mm      | ---        | ---        | ---        | ---        | ---        | ---        | ---        | NL         | KRASALLNLY  |
| Efs_Rn      | ---        | ---        | ---        | ---        | ---        | ---        | ---        | NL         | KRASALLNLY  |
| p130Cas_Gg  | ---        | ---        | ---        | ---        | ---        | ---        | ---        | ---        | PSLSQAA     |
| Consistency | 4442405335 | 3352353352 | 2322321122 | 1111033327 | 5354965574 |            |            |            |             |



|             | 610        | 620        | 630        | 640        | 650         |
|-------------|------------|------------|------------|------------|-------------|
| NEDD9_Hs    | RLQQALEMGV | SSLMALVTTD | -----WRCY- | GYMERHINEI | RTAVDKVELF  |
| NEDD9_Mm    | RLQQTLEMGV | CSLMSLVTTD | -----WRCY- | GYMERHINEI | RTAVDKVELF  |
| NEDD9_Rn    | WLQQTLETGI | CSLMSLVTTD | -----WRSY- | GYMERHINEI | RTAVDKVELF  |
| NEDD9_Gg    | RLQQMVETAV | NNLMAFATAD | -----WRSY- | SYMEKHINEI | HTAVDKVEQS  |
| p130Cas_Hs  | RLQQGVSATV | AHLLDLAGSA | GATGSWRSPS | EPQEPLVQDL | QAAVAAVQSA  |
| p130Cas_Mm  | RLQQGVSTTV | AHLLDLVGSA | SGPGGWRGTS | EPQEPPAQDL | KAAVA AVHGA |
| p130Cas_Rn  | RLQQGVSTTV | AHLLDLVGSA | SGPGGWRSTS | EPQEPPVQDL | KAAVA AVHGA |
| HEPL_Hs     | ALQHKVVSSV | AGLMLFVSRK | -----WRFK- | DYLEANIDAI | HRSTDHIEES  |
| HEPL_Mm     | SLQHKVASSA | AGLLLFVSRK | -----WRFK- | DSLETNIHRI | RRAADHVEES  |
| HEPL_Rn     | ALQSRVASSV | AGLLLFVSRK | -----WRFK- | DSLETNVNRI | RGADRVEES   |
| HEPL_Gg     | RLQHSVSSSV | ASLMIFVSSK | -----WRLQ- | EHLEKNIEEI | HRAIDHIKVS  |
| Efs_Hs      | EAPEELLADG | EG-----    | -----      | GGTDEGIYDV | PLLGPEAPPS  |
| Efs_Mm      | EAPEELLANG | ES-----    | -----      | RDADEGIYDV | PLLGPEPPSP  |
| Efs_Rn      | EAPEELLANG | ES-----    | -----      | RDADEGIYDV | PLLGPEPPSP  |
| p130Cas_Gg  | DAYPVGSAS- | -----      | -----      | --PPQDIYQV | PPSVAQAQDI  |
| Consistency | 4765374655 | 4454234322 | 0000055210 | 4347438468 | 4475546534  |

|             | 660        | 670        | 680         | 690         | 700         |
|-------------|------------|------------|-------------|-------------|-------------|
| NEDD9_Hs    | LKEYLHFVKG | AVANAACLPE | LILHNKMKRE  | LQRVEDSHQI  | LSQTS HDLNE |
| NEDD9_Mm    | LREYLHFVKG | ALANASCLPE | LVLHNKMKRE  | LQRVEDSHQI  | LSQTS HDLNE |
| NEDD9_Rn    | LREYLHFARG | ALANASCLPE | PVLLNKMNRE  | LQRVDDSHQI  | LSQTS HDLNE |
| NEDD9_Gg    | LLEYLQFAKG | SAANASFLSE | ISLHNKMRRE  | VQRLED SHQI | LTQTS HDLNS |
| p130Cas_Hs  | VHELLEFARS | AVGNAHTSD  | RALHAKLSRQ  | LQKMEDVHQT  | LVAHGQALDA  |
| p130Cas_Mm  | VHELLEFARG | AVSNATHSD  | RTLHAKLSRQ  | LQKMEDVYQT  | LVVHGQVLD S |
| p130Cas_Rn  | VHELLEFARS | AVSSATHSD  | RTLHAKLSRQ  | LQKMEDVYQT  | LVVHGQVLD S |
| HEPL_Hs     | VREFLDFARG | VHGTACNLTD | SNLQNRIRDQ  | MQTISNSYRI  | LLETKESLDN  |
| HEPL_Mm     | VREFLDFARG | VGGTACNLTD | SYLQARIRDQ  | LQTISSSYQT  | LLDAKGS LDR |
| HEPL_Rn     | LREFLDFARG | VGGTACNLTD | SYLQARVRDQ  | LQTISSSYQT  | LLDAKGS LDR |
| HEPL_Gg     | LGEFLAFARA | LKVNASYLTD | NNLQIRIKKQ  | LEILMNSFQI  | LTETREALNN  |
| Efs_Hs      | PEPPGALASH | DQDTLAQLLA | RSPPPPHRPR  | LPSAESLSRR  | PLPALPVPEA  |
| Efs_Mm      | EPPVASSST- | DLDTVAQLPT | RSSPPQHRPR  | LPSTESLSRR  | PLPALPVSEA  |
| Efs_Rn      | EPPAASSSA- | DPDTVAQLLT | RSPPPQHRPR  | LPSTESLSRR  | PLPALPVSEA  |
| p130Cas_Gg  | YQVPPSLDAR | SWEGP----  | KPSGKVL LPT | RVGQVYVYDS  | PKGEQDEYDF  |
| Consistency | 5464646754 | 4345753645 | 4464465546  | 8645655574  | 6545444664  |

|             | 710         | 720        | 730         | 740         | 750         |
|-------------|-------------|------------|-------------|-------------|-------------|
| NEDD9_Hs    | CSWSLNILAI  | NKPQNKDDL  | DRFVMVAKTV  | PDDAKQLTTT  | INTNAEALFR  |
| NEDD9_Mm    | CSWSLNILAI  | NKPQNKDDL  | DRFVMVAKTV  | PDDAKQLTTT  | ISTYAETLFR  |
| NEDD9_Rn    | CSWSLNVLAI  | NKPQNKDDL  | DRFVMVAKTV  | PDDAKQLTTT  | ISTYAETLFR  |
| NEDD9_Gg    | YNWSLNVLAV  | NRLQNKDDL  | DRFVMVAKTV  | PDDAKQLTTT  | ISVNAELLFK  |
| p130Cas_Hs  | GRGSGGAT--  | -----LEDL  | DRLVACSRAV  | PEDAKQLASF  | LHGNASLLFR  |
| p130Cas_Mm  | GRGSPGFT--  | -----PEDL  | DRLVACSRAV  | PEDAKQLASF  | LHGNASLLFR  |
| p130Cas_Rn  | GRGGPGFT--  | -----LDDL  | DRLVACSRAV  | PEDAKQLASF  | LHGNASLLFR  |
| HEPL_Hs     | RNWPLEV LVT | DSVQNSPDDL | ERFVMVARM L | PEDIKRFASI  | VIANGRL LFK |
| HEPL_Mm     | CNWSLEV LVT | DKVQNSLDDL | ERFVATARI V | PEDVKRFTSI  | VIANGKLLFK  |
| HEPL_Rn     | CNWSLEV LVV | DKAQSSVDDL | ERFVQVARV V | PEDVKRFTSI  | VVANGKLLFK  |
| HEPL_Gg     | CNWSLEALVL  | KKPYSNPDDL | DRFVMVARTI  | PDDLKR FVSI | IIANGKLLFR  |
| Efs_Hs      | PSPSPVPS--  | -----PAPG  | RKGSIQDRPL  | PPPPPR LPGY | GGPKVEGDPE  |
| Efs_Mm      | PAPSPAPS--  | -----PAPG  | RKGSIQDRPL  | PPPPPC LPGY | GGLKPEGDPE  |
| Efs_Rn      | PAPSPAPS--  | -----PAPG  | RKGSIQDRPL  | PPPPPC LPGY | GGLKPEGDPE  |
| p130Cas_Gg  | -----       | -----      | -----       | SRHLLSLGS-  | -----       |
| Consistency | 2436434511  | 1212213565 | 5746445747  | 9565657564  | 4335454556  |

|             | 760        | 770        | 780        | 790         | 800        |
|-------------|------------|------------|------------|-------------|------------|
| NEDD9_Hs    | PGPGSLHLKN | GPESIMNSTE | YPHGGSQGQL | LHPGDHKAQA  | HNKALP--PG |
| NEDD9_Mm    | ADPANSHLKN | GPNSIMNSSE | YTHPGSQMQP | LHPGDYKAQV  | HSKPLP--PS |
| NEDD9_Rn    | VDPGNSHLKN | GPDSITNSIE | YTHTGSQMOP | LRPGDYKGQV  | HNKPLP--PT |
| NEDD9_Gg    | QVSGSSRFRS | VPENMNA--- | -PDYAYNSPH | MQRHGKQPQN  | HFSSLP--PL |
| p130Cas_Hs  | RTKATAPGP- | -----      | ---EGGGTLH | PNPTDKTSSI  | QSRPLPSPPK |
| p130Cas_Mm  | RTKAPGPGP- | -----      | ---EGSSSLH | PNPTDKASSI  | QSRPLPSPPK |
| p130Cas_Rn  | RTKAPGPGP- | -----      | ---EGSSSLH | LNPTDKASSI  | QSRPLPSPPK |
| HEPL_Hs     | RNCEKEE--- | -----      | ---TVQLT   | PNAEFKCEKY  | IOPP-----  |
| HEPL_Mm     | QNCEKGE--- | -----      | ---M-DLK   | CERCIRPPQR  | ET-----    |
| HEPL_Rn     | QNCERGE--- | -----      | ---V-DWR   | CERC IQPPQR | EAESH----- |
| HEPL_Gg     | KNEKEQE--- | -----      | ---MKQPR   | VSPGYKMPKQ  | ITSP-----  |
| Efs_Hs      | GR-----    | -----      | ---EME     | DDPAGHNEY   | EGIP-----  |
| Efs_Mm      | CR-----    | -----      | ---EVA     | NDPAGPHNEY  | EGIP-----  |
| Efs_Rn      | CR-----    | -----      | ---EVD     | SDSGGPHNEY  | EGIP-----  |
| p130Cas_Gg  | -----      | -----      | -----      | -----       | -----      |
| Consistency | 3312222010 | 0000000000 | 0000121433 | 2453333353  | 4435220020 |

|          | 810        | 820         | 830        | 840        | 850        |
|----------|------------|-------------|------------|------------|------------|
| NEDD9_Hs | LSKEQAPDCS | SSDGSE RSWM | DDYDYVHLQG | KEEFERQOKE | LLEKENIMKQ |

|             |            |             |             |             |             |            |
|-------------|------------|-------------|-------------|-------------|-------------|------------|
| NEDD9_Mm    | LSKDQPPDCG | SSDGSEERSWM | DDYDYVHLQG  | KEEFERQOKE  | LLEKENIMKQ  |            |
| NEDD9_Rn    | LSKEQPPDCS | SSDGSEERSWM | DDYDYVHLQG  | KEEFERQOKE  | LLEKENIMKQ  |            |
| NEDD9_Gg    | LSKGQPPHST | ASESSEKSWM  | DDYDYVHLQG  | KEEFERQOKE  | LLEKENI IKQ |            |
| p130Cas_Hs  | FTSQDSPD-G | QYENSEGGWM  | EDYDYVHLQG  | KEEFEKTQKE  | LLEKGSITRQ  |            |
| p130Cas_Mm  | FTSQDSPD-G | QYENSEGGWM  | EDYDYVHLQG  | KEEFEKTQKE  | LLERGNIMRQ  |            |
| p130Cas_Rn  | FTSQDSPD-G | QYENSEGGWM  | EDYDYVHLQG  | KEEFEKTQKE  | LLEKGNIVRQ  |            |
| HEPL_Hs     | -----      | -----QRET   | ESHQKSTPST  | KQREDE---   | -----       |            |
| HEPL_Mm     | -----      | -----       | ESYQESSPFD  | RQPTTE---   | -----       |            |
| HEPL_Rn     | -----PER   | SSPFHKQPAA  | EHSLELAKKS  | RGDVC GQKSP | NLQ-----    |            |
| HEPL_Gg     | -----      | -----RRIEI  | DSL PVSAPDK | PNPSQGS---  | -----       |            |
| Efs_Hs      | -----      | -----MA     | EEYDYVHLKG  | MDKAQGSRPP  | D-----      |            |
| Efs_Mm      | -----      | -----MA     | EEYDYVHLKG  | VDTAQGSRPL  | D-----      |            |
| Efs_Rn      | -----      | -----MA     | EEYDYVHLKG  | VDKAQGSRPL  | D-----      |            |
| p130Cas_Gg  | -----      | -----Q      | EIXDVPPVRG  | ALPSQVSQGT  | KFNH-----F  |            |
| Consistency | 1111112101 | 1111222134  | 85-2147483  | 6486565556  | 5554644433  | 2322112112 |

|             |             |             |            |              |            |
|-------------|-------------|-------------|------------|--------------|------------|
|             | ..... 860   | ..... 870   | ..... 880  | ..... 890    | ..... 900  |
| NEDD9_Hs    | NKMQLEHHQL  | SQFOLLEQEI  | TKPVENDISK | WKPSQSL-PT   | TNSG-VSAQD |
| NEDD9_Mm    | SKAQLEHHQL  | SQFOLLEQEI  | TKPVENDISK | WKPSQSL-PT   | TNNS-VGAQD |
| NEDD9_Rn    | SKAQLEHHQL  | SQFOLLEQEI  | TKPVENDISK | WKPSQSL-PT   | TNNS-VGAQD |
| NEDD9_Gg    | SKTELEHHQI  | NQFQRLEQEI  | TKPVENDISK | WKPPQAL-QT   | ANST-IAFHD |
| p130Cas_Hs  | GKSQLELQQL  | KQFERLEQEV  | SRPIDHDLAN | WTPAQPLAPG   | RTGG-LGPSD |
| p130Cas_Mm  | GKGQLELQQL  | KQFERLEQEV  | SRPIDHDLAN | WTPAQPLVPG   | RTGG-LGPSD |
| p130Cas_Rn  | GKGQLELQQL  | KQFERLEQEV  | SRPIDHDLAN | WTPAQPLVPG   | RTGG-LGPSD |
| HEPL_Hs     | -----       | HSSELLKKNR  | -----ANICG | QNP G-----PL | IPQP-SSQQT |
| HEPL_Mm     | -----       | HSFELARKNR  | -----VNVCW | QSPP-----PL  | TSPS-PSGQN |
| HEPL_Rn     | -----KKGK   | NTMEGKS NEN | -----QDFCG | TSPT-----PL  | PSPS-PSGQN |
| HEPL_Gg     | -----NET    | TKENVSEDCE  | -----YVQLQ | VLPS-----TK  | KNAV-RSQQD |
| Efs_Hs      | -----QACT   | GDPELPERGM  | -----      | PAPQEALSPG   | EPLV-VSTGD |
| Efs_Mm      | -----KAFP   | VDPELLERGL  | -----      | AERKEALSPE   | EPLV-LSTGD |
| Efs_Rn      | -----NAFP   | ADPELLERGL  | -----      | VEQKEALSPE   | EPLV-LSTGD |
| p130Cas_Gg  | YVTPPIYSTQK | KQPERREQEE  | KRPKDTDGSK | GSPPQQYGPE   | RGGGALCAAD |
| Consistency | 1212222333  | 4647558654  | 1221224332 | 3484424083   | 4434056357 |

|             |             |             |              |             |              |
|-------------|-------------|-------------|--------------|-------------|--------------|
|             | ..... 910   | ..... 920   | ..... 930    | ..... 940   | ..... 950    |
| NEDD9_Hs    | RQLLCFYDQ   | CETHFISLLN  | AIDALFSCVS   | SAQPPRIFVA  | HSKFVILSAH   |
| NEDD9_Mm    | RQLLCFYDQ   | CETHFISLLN  | AIDALFSCVS   | SAQPPRIFVA  | HSKFVILSAH   |
| NEDD9_Rn    | RQLLCFYDQ   | CETHFISLLN  | AIDALFSCVS   | SAQPPRIFVA  | HSKFVILSAH   |
| NEDD9_Gg    | RQPLLFYSDQ  | YETHFN SLLN | TIDAFFSCVS   | ASQPPRIFVA  | HSKLVILSAH   |
| p130Cas_Hs  | RQLLLFYLEQ  | CEANLTTLTN  | AVDAFFTAVA   | TNQP PKIFVA | HSKFVILSAH   |
| p130Cas_Mm  | RQLLLFYLEQ  | CEANLTTLTD  | AVDAFFTAVA   | TNQP PKIFVA | HSKFVILSAH   |
| p130Cas_Rn  | RQLLLFYLEQ  | CEANLTTLTD  | AVDAFFTAVA   | TNQP PKIFVA | HSKFVILSAH   |
| HEPL_Hs     | PERKPRLSEH  | CRLYFGALFK  | AISAFHG SLS  | SSQPAE-IIT  | QSKLVIMVGQ   |
| HEPL_Mm     | TERKIHL SKH | SRLYFGALFK  | AISVFASSLS   | NGQPPEVFIT  | QSKLVITVGQ   |
| HEPL_Rn     | VERKIRLSEH  | SRLYFGALFK  | AIGVFASSLS   | NSQPPEVFIT  | QSKLAITIGQ   |
| HEPL_Gg     | SAKKVVIPEQ  | CRLCFGALHK  | AIAVFN S SLS | SKQPPEVFIS  | HSKLIIMVGQ   |
| Efs_Hs      | LQLLYFYAGQ  | CQSHYSALQA  | AVAALMSSTQ   | ANQP PRLFVP | HSKR VVVA AH |
| Efs_Mm      | LQLLHFYAGQ  | CQSHYSALQA  | AVAALVASTQ   | ANQP PCLFVP | HGKR VVVA AH |
| Efs_Rn      | LQLLHFYAGQ  | CQSHYSALQT  | AVAALMSSTQ   | ANQP PCLFVP | HGKR VVVA AH |
| p130Cas_Gg  | RQLLLFYLEQ  | CEANLTTLTN  | AIDAFFTAIS   | TNQP PKIFVA | HSKF IILSAH  |
| Consistency | 4856467457  | 7755646*45  | 9958747667   | 65**957996  | 78*5996677   |

|             |              |            |             |              |             |
|-------------|--------------|------------|-------------|--------------|-------------|
|             | ..... 960    | ..... 970  | ..... 980   | ..... 990    | ..... 1000  |
| NEDD9_Hs    | KL VFI GDTLT | RQVTAQDIRN | KVMNSSNQLC  | EQLKTIVMAT   | KMAALHYPST  |
| NEDD9_Mm    | KL VFI GDTLT | RQVAAQDIRN | KVRNSSNQLC  | EQLKTIVMAT   | KMAALHYPST  |
| NEDD9_Rn    | KL VFI GDTLT | RQVAAQDIRN | KVRNSSNQLC  | EQLKTIVMAT   | KMAALHYPST  |
| NEDD9_Gg    | KL VFI GDTLT | RQLTSQDIRN | RVRNSSDQLC  | EL LKSIVMAT  | KMAALHYPHT  |
| p130Cas_Hs  | KL VFI GDTLS | RQAKAADVRS | QVTHYSNLLC  | DL LRGIVATT  | KAAALQYPS P |
| p130Cas_Mm  | KL VFI GDTLS | RQAKAADVRS | QVTHYSNLLC  | DL LRGIVATT  | KAAALQYPS P |
| p130Cas_Rn  | KL VFI GDTLS | RQAKAADVRS | KVTHYSNLLC  | DL LRGIVATT  | KAAALQYPS P |
| HEPL_Hs     | KL V---DTLC  | METQERDVRN | EILRGSSHL C | SL LK DVALAT | KNAVLTYPSP  |
| HEPL_Mm     | KL V---DTLC  | SETQEKDERN | EILCGSSHL C | GL LK DLALAT | KSAVIQYPS P |
| HEPL_Rn     | KL V---DTLC  | SETQERDERN | EILCGSSHL C | GL LK DLALAT | KNAVIQYPS P |
| HEPL_Gg     | KIV---DSL C  | QDTQLREARS | DVLHSSSRFC  | SL LK NLALAT | KNAAIQYPNA  |
| Efs_Hs      | RLV FVGD TLG | RLAASAPLRA | QVRAAGTALG  | QALRATVLAV   | KGAALGYPS S |
| Efs_Mm      | RLV FVGD TLG | RLAASAALRA | QVGAAGTMLA  | QTLRATVLAV   | KGAALGYPS D |
| Efs_Rn      | RLV FVGD TLG | RLAASAPLRA | QVGAAGTVLA  | QTLRATVLAV   | KGAALGYPS D |
| p130Cas_Gg  | KL VFI GDTLS | RQAKAQDVRH | KVTHYSNLLC  | EL LKEIVVST  | KAAALHYPSP  |
| Consistency | 89*545*9*4   | 75656566*5 | 6944486497  | 55*8477678   | *4*894**85  |

|          |            |            |             |
|----------|------------|------------|-------------|
|          | ..... 1010 | ..... 1020 | ..... 1030  |
| NEDD9_Hs | TALQEMVHQV | TDLSRNAQLF | KRSLLEMATF  |
| NEDD9_Mm | TALQEMVHQV | TDLSRNAQLF | KRSLLEMATF  |
| NEDD9_Rn | TALQEMVHQV | TDLSRNAQLF | KRSLLEMATF  |
| NEDD9_Gg | AALQEMVNRV | TELSYHAQLF | KL SLVQMASL |

|             |   |   |   |   |   |   |   |   |   |   |   |   |   |   |   |   |   |   |   |   |   |   |   |   |   |   |   |   |   |   |
|-------------|---|---|---|---|---|---|---|---|---|---|---|---|---|---|---|---|---|---|---|---|---|---|---|---|---|---|---|---|---|---|
| p130Cas_Hs  | S | A | A | Q | D | M | V | E | R | V | K | E | L | G | H | S | T | Q | Q | F | R | R | V | L | G | Q | L | A | A | A |
| p130Cas_Mm  | S | A | A | Q | D | M | V | D | R | V | K | E | L | G | H | S | T | Q | Q | F | R | R | V | L | G | Q | L | A | A | A |
| p130Cas_Rn  | S | A | A | Q | D | M | V | D | R | V | K | E | L | G | H | S | T | Q | Q | F | R | R | V | L | G | Q | L | A | A | A |
| HEPL_Hs     | A | A | L | G | H | L | Q | A | E | A | E | K | L | E | Q | H | T | R | Q | F | R | G | T | L | G | - | - | - | - | - |
| HEPL_Mm     | S | A | L | S | L | L | Q | S | E | V | E | R | L | E | H | H | S | R | K | F | R | D | T | L | E | - | - | - | - | - |
| HEPL_Rn     | S | A | L | G | L | L | Q | S | E | L | E | K | L | E | Y | H | S | R | K | F | R | G | T | L | E | - | - | - | - | - |
| HEPL_Gg     | D | A | M | R | E | L | Q | N | K | N | D | E | L | Y | K | Y | T | Q | Q | F | R | A | M | L | E | - | - | - | - | - |
| Efs_Hs      | P | A | I | Q | E | M | V | Q | C | V | T | E | L | A | G | Q | A | L | Q | F | T | T | L | L | T | S | L | A | P | - |
| Efs_Mm      | T | A | V | Q | E | M | A | R | C | V | A | E | L | A | G | Q | A | L | R | F | T | T | L | L | A | G | L | L | P | - |
| Efs_Rn      | T | A | V | Q | E | M | A | R | C | V | A | E | L | A | G | Q | A | L | R | F | T | T | L | L | A | G | L | L | P | - |
| p130Cas_Gg  | A | A | S | K | D | M | V | E | R | V | K | D | L | A | N | S | T | Q | Q | F | R | M | V | L | G | Q | L | A | A | M |
| Consistency | 6 | * | 6 | 6 | 5 | 8 | 6 | 4 | 4 | 7 | 5 | 6 | * | 5 | 4 | 5 | 6 | 6 | 5 | * | 6 | 4 | 5 | * | 3 | 3 | 4 | 4 | 2 | 1 |
